# Supplementary figures and images for: Effects of Oral Collagen for Skin Anti-Aging: A Systematic Review and Meta-Analysis
Source: MDPI journal article supplement (doi:10.3390/nu15092080), 2023-04-26

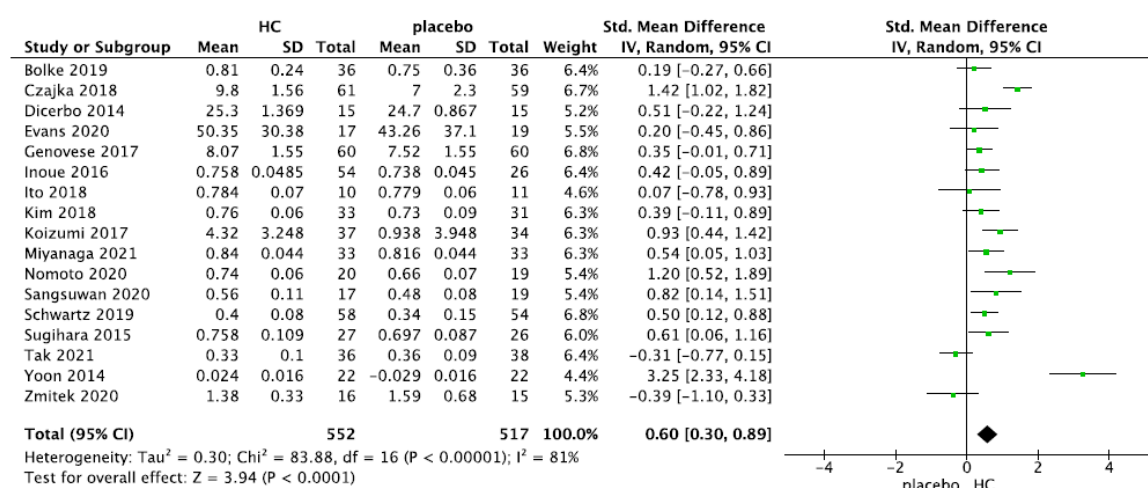

Figure S1. Elasticity-sensitivity analysis. [26–28, 31,33-35,37,39–44,47–49]

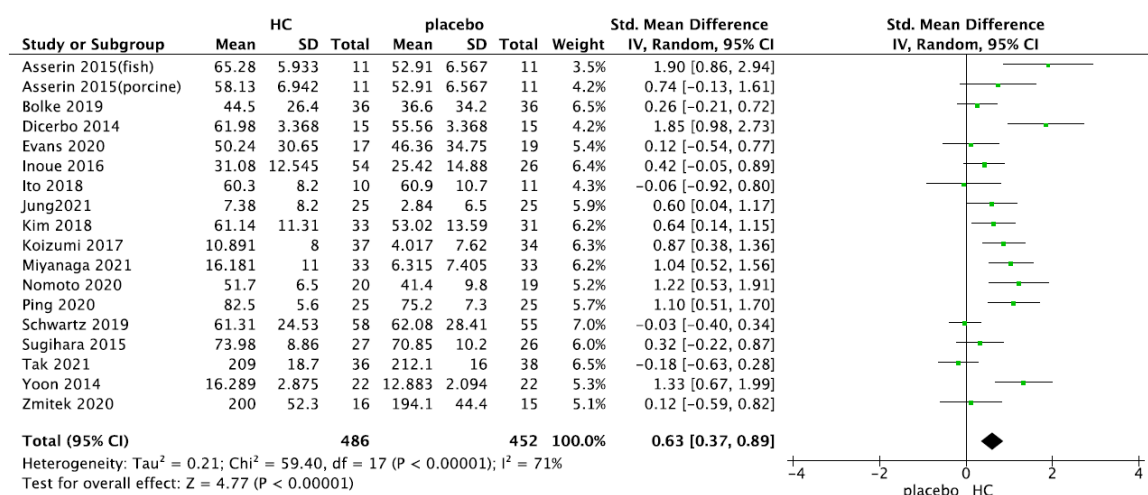

Figure S2. Hydration-sensitivity analysis. [26–28,30–31,33-35,39,40,43,44,46–50]

Supplement: s1 [file s1]
